# Supplementary material for: A candidate gene identification strategy utilizing mouse to human big-data mining: “3R-tenet” in COPD genetic research
Source: PubMed Central journal article supplement (PMC5989378; doi:10.1186/s12931-018-0795-y), 2018-06-06
Supplement: 12931_2018_795_MOESM1_ESM.pdf [file 12931_2018_795_MOESM1_ESM.pdf]

## Supplementary material

### A candidate gene identification strategy utilizing mouse to human big-data mining: “3R-Tenet” in COPD genetic research

Sangeetha Vishweswaraiah<sup>1</sup>, Leema George<sup>1</sup>, Natarajan Purushothaman<sup>2</sup>, Koustav Ganguly<sup>1,3</sup>

<sup>1</sup>SRM Research Institute, SRM University, Chennai 603203 India

<sup>2</sup>Department of Genetic Engineering; School of Bioengineering, Faculty of Engineering and Technology; SRM University, Chennai 603203 India

<sup>3</sup>Work Environment Toxicology; Institute of Environmental Medicine, Karolinska Institutet; Box 287, SE-171 77 Stockholm, Sweden

|                          |                                   |
|--------------------------|-----------------------------------|
| Sangeetha Vishweswaraiah | sangeethav.srm@gmail.com          |
| Leema George             | leemag.srm@gmail.com              |
| Natarajan Purushothaman  | purushothaman.n@ktr.srmuniv.ac.in |
| Koustav Ganguly          | koustav.ganguly@ki.se             |

**Correspondence:** Koustav Ganguly, PhD

Unit of Work Environment Toxicology, Institute of Environmental Medicine, Karolinska Institutet; Box 287, SE-171 77 Stockholm, Sweden

Email: koustav.ganguly@ki.se; Phone: +46-0852487133

This study was supported by Department of Biotechnology, Government of India: BT/PR12987/INF/22/205/2015, VINNOVA (2016-01951) (K.G)

**Supplementary table ST1: List of the genes screened for association to higher Chronic Obstructive Pulmonary Disease (COPD) susceptibility**

| Sl. No. | Gene Symbol | Gene Name                                                           | Entrez ID |
|---------|-------------|---------------------------------------------------------------------|-----------|
| 1       | ABCA10      | ATP-binding cassette, sub-family A (ABC1), member 10                | 10349     |
| 2       | ABCG1       | ATP-binding cassette, sub-family G (WHITE), member 1                | 9619      |
| 3       | ACSM1       | Acyl-CoA synthetase medium-chain family member 1                    | 116285    |
| 4       | ADAM19      | ADAM metallopeptidase domain 19                                     | 8728      |
| 5       | ADAMTS15    | ADAM metallopeptidase with thrombospondin type 1 motif, 15          | 170689    |
| 6       | ADH1C       | Alcohol dehydrogenase 1C (class I), gamma polypeptide               | 126       |
| 7       | AFP         | Alpha-fetoprotein                                                   | 174       |
| 8       | AGER        | Advanced glycosylation end product-specific receptor                | 177       |
| 9       | AKAP5       | A kinase (PRKA) anchor protein 5                                    | 9495      |
| 10      | AKR1E2      | Aldo-keto reductase family 1, member E2                             | 83592     |
| 11      | ALAD        | Aminolevulinate dehydratase                                         | 210       |
| 12      | ALAS2       | Aminolevulinate, delta-, synthase 2                                 | 212       |
| 13      | ALB         | Albumin                                                             | 213       |
| 14      | ALOX15      | Arachidonate 15-lipoxygenase                                        | 246       |
| 15      | ANGPTL7     | Angiopoietin-like 7                                                 | 10218     |
| 16      | ANKRD1      | Ankyrin repeat domain 1 (cardiac muscle)                            | 27063     |
| 17      | ANKRD63     | Ankyrin repeat domain 63                                            | 100131244 |
| 18      | APOL3       | Apolipoprotein L, 3                                                 | 80833     |
| 19      | ARHGAP20    | Rho GTPase activating protein 20                                    | 57569     |
| 20      | ARMC2       | Armadillo repeat containing 2                                       | 84071     |
| 21      | ARMC3       | Armadillo repeat containing 3                                       | 219681    |
| 22      | ARNTL       | Aryl hydrocarbon receptor nuclear translocator-like                 | 406       |
| 23      | ARSI        | Arylsulfatase family, member I                                      | 340075    |
| 24      | ASPN        | Asporin                                                             | 54829     |
| 25      | ATP6V0D2    | ATPase, H <sup>+</sup> transporting, lysosomal 38kDa, V0 subunit d2 | 245972    |
| 26      | BAIAP2L1    | BAI1-associated protein 2-like 1                                    | 55971     |
| 27      | BHLHE40     | Basic helix-loop-helix family, member e40                           | 8553      |
| 28      | BHLHE41     | Basic helix-loop-helix family, member e41                           | 79365     |
| 29      | BMP3        | Bone morphogenetic protein 3                                        | 651       |
| 30      | BPIFA1      | BPI fold containing family A, member 1                              | 51297     |
| 31      | C10orf11    | Chromosome 10 open reading frame 11                                 | 83938     |
| 32      | C12orf57    | Chromosome 12 open reading frame 57                                 | 113246    |
| 33      | C16orf89    | Chromosome 16 open reading frame 89                                 | 146556    |
| 34      | C1S         | Complement component 1, s subcomponent                              | 716       |
| 35      | C5          | Complement component 5                                              | 727       |
| 36      | CALML3      | Calmodulin-like 3                                                   | 810       |
| 37      | CASC4       | Cancer susceptibility candidate 4                                   | 113201    |
| 38      | CASP12      | Caspase 12 (gene/pseudogene)                                        | 100506742 |
| 39      | CCDC141     | Coiled-coil domain containing 141                                   | 285025    |

|    |         |                                                                           |        |
|----|---------|---------------------------------------------------------------------------|--------|
| 40 | CCDC190 | Coiled-Coil Domain Containing 190                                         | 339512 |
| 41 | CCDC38  | Coiled-coil domain containing 38                                          | 120935 |
| 42 | CCDC59  | Coiled-coil domain containing 59                                          | 29080  |
| 43 | CCL11   | Chemokine (C-C motif) ligand 11                                           | 6356   |
| 44 | CCL15   | Chemokine (C-C motif) ligand 15                                           | 6359   |
| 45 | CCL16   | Chemokine (C-C motif) ligand 16                                           | 6360   |
| 46 | CCL17   | Chemokine (C-C motif) ligand 17                                           | 6361   |
| 47 | CCL18   | Chemokine (C-C motif) ligand 18                                           | 6362   |
| 48 | CCL22   | Chemokine (C-C motif) ligand 22                                           | 6367   |
| 49 | CCL23   | Chemokine (C-C motif) ligand 23                                           | 6368   |
| 50 | CCL3    | Chemokine (C-C motif) ligand 3                                            | 6348   |
| 51 | CCL5    | Chemokine (C-C motif) ligand 5                                            | 6352   |
| 52 | CCR5    | Chemokine (C-C motif) receptor 5                                          | 1234   |
| 53 | CCR8    | Chemokine (C-C motif) receptor 8                                          | 1237   |
| 54 | CD14    | CD14 molecule                                                             | 929    |
| 55 | CD200   | CD200 molecule                                                            | 4345   |
| 56 | CD200R1 | CD200 receptor 1                                                          | 131450 |
| 57 | CD209   | CD209 molecule                                                            | 30835  |
| 58 | CD36    | CD36 molecule (thrombospondin receptor)                                   | 948    |
| 59 | CD68    | CD68 molecule                                                             | 968    |
| 60 | CD74    | CD74 molecule, major histocompatibility complex, class II invariant chain | 972    |
| 61 | CD86    | CD86 molecule                                                             | 942    |
| 62 | CDC123  | Cell division cycle 123 homolog ( <i>S. cerevisiae</i> )                  | 8872   |
| 63 | CFD     | Complement factor D (adipsin)                                             | 1675   |
| 64 | CFDP1   | Craniofacial development protein 1                                        | 10428  |
| 65 | CH25H   | Cholesterol 25-hydroxylase                                                | 9023   |
| 66 | CHI3L1  | Chitinase 3-like 1 (cartilage glycoprotein-39)                            | 1116   |
| 67 | CHIA    | Chitinase, acidic                                                         | 27159  |
| 68 | CHIA    | Chitinase, acidic                                                         | 27159  |
| 69 | CHRD1   | Chordin-like 1                                                            | 91851  |
| 70 | CHRM3   | Cholinergic receptor, muscarinic 3                                        | 1131   |
| 71 | CHSY3   | Chondroitin sulfate synthase 3                                            | 337876 |
| 72 | CKLF    | Chemokine-like factor                                                     | 51192  |
| 73 | CLCA3P  | Chloride channel accessory 3, pseudogene                                  | 9629   |
| 74 | CLDN1   | Claudin 1                                                                 | 9076   |
| 75 | CLEC2D  | C-type lectin domain family 2, member D                                   | 29121  |
| 76 | CLEC6A  | C-type lectin domain family 6, member A                                   | 93978  |
| 77 | CLEC7A  | C-type lectin domain family 7, member A                                   | 64581  |
| 78 | CLEC9A  | C-type lectin domain family 9, member A                                   | 283420 |
| 79 | CLIC5   | Chloride intracellular channel 5                                          | 53405  |
| 80 | COL28A1 | Collagen, type XXVIII, alpha 1                                            | 340267 |
| 81 | COPZ2   | Coatmer protein complex, subunit zeta 2                                   | 51226  |

|     |            |                                                                   |        |
|-----|------------|-------------------------------------------------------------------|--------|
| 82  | COX6A1     | Cytochrome c oxidase subunit VIa polypeptide 1                    | 1337   |
| 83  | CP         | Ceruloplasmin (ferroxidase)                                       | 1356   |
| 84  | CPEB1      | Cytoplasmic polyadenylation element binding protein 1             | 64506  |
| 85  | CRY2       | Cryptochrome 2 (photolyase-like)                                  | 1408   |
| 86  | CTSE       | Cathepsin E                                                       | 1510   |
| 87  | CTSH       | Cathepsin H                                                       | 1512   |
| 88  | CTSK       | Cathepsin K                                                       | 1513   |
| 89  | CTSS       | Cathepsin S                                                       | 1520   |
| 90  | CXCL11     | Chemokine (C-X-C motif) ligand 11                                 | 6373   |
| 91  | CXCL12     | Chemokine (C-X-C motif) ligand 12                                 | 6387   |
| 92  | CXCL13     | Chemokine (C-X-C motif) ligand 13                                 | 10563  |
| 93  | CXCL8      | C-X-C motif chemokine ligand 8                                    | 3576   |
| 94  | CXCL8/ IL8 | C-X-C motif chemokine ligand 8                                    | 3576   |
| 95  | CXCR6      | Chemokine (C-X-C motif) receptor 6                                | 10663  |
| 96  | CYBB       | Cytochrome b-245, beta polypeptide                                | 1536   |
| 97  | CYP2E1     | Cytochrome P450, family 2, subfamily E, polypeptide 1             | 1571   |
| 98  | CYP2J2     | Cytochrome P450, family 2, subfamily J, polypeptide 2             | 1573   |
| 99  | DBP        | D site of albumin promoter (albumin D-box) binding protein        | 1628   |
| 100 | DCDC2B     | Doublecortin domain containing 2B                                 | 149069 |
| 101 | DEFB4A     | Defensin, beta 4A                                                 | 1673   |
| 102 | DNASE1L3   | Deoxyribonuclease I-like 3                                        | 1776   |
| 103 | DPEP1      | Dipeptidase 1 (renal)                                             | 1800   |
| 104 | DRAM1      | DNA-damage regulated autophagy modulator 1                        | 55332  |
| 105 | EGFLAM     | EGF-like, fibronectin type III and laminin G domains              | 133584 |
| 106 | EMCN       | Endomucin                                                         | 51705  |
| 107 | EMR1       | EGF-like module containing, mucin-like, hormone receptor-like 1   | 2015   |
| 108 | ENTPD4     | Ectonucleoside triphosphate diphosphohydrolase 4                  | 9583   |
| 109 | EPHA7      | EPH receptor A7                                                   | 2045   |
| 110 | F7         | Coagulation factor VII (serum prothrombin conversion accelerator) | 2155   |
| 111 | FABP1      | Fatty acid binding protein 1, liver                               | 2168   |
| 112 | FAM13A     | Family with sequence similarity 13, member A                      | 10144  |
| 113 | FAM198B    | Family with sequence similarity 198, member B                     | 51313  |
| 114 | FAR2       | Fatty acyl coa reductase 2                                        | 55711  |
| 115 | FCER2      | Fc fragment of ige, low affinity II, receptor for (CD23)          | 2208   |
| 116 | FCGR1A     | Fc fragment of igg, high affinity Ia, receptor (CD64)             | 2209   |
| 117 | FETUB      | Fetuin B                                                          | 26998  |
| 118 | FGF1       | Fibroblast growth factor 1 (acidic)                               | 2246   |
| 119 | FGG        | Fibrinogen gamma chain                                            | 2266   |
| 120 | FIRRE      | Firre intergenic repeating RNA element                            | 286467 |
| 121 | FMO1       | Flavin containing monooxygenase 1                                 | 2326   |
| 122 | FPR1       | Formyl peptide receptor 1                                         | 2357   |

|     |           |                                                               |        |
|-----|-----------|---------------------------------------------------------------|--------|
| 123 | FST       | Follistatin                                                   | 10468  |
| 124 | FZD6      | Frizzled family receptor 6                                    | 8323   |
| 125 | GABBR1    | Gamma-aminobutyric acid (GABA) B receptor, 1                  | 2550   |
| 126 | GABRA3    | Gamma-aminobutyric acid (GABA) A receptor, alpha 3            | 2556   |
| 127 | GAS5      | Growth arrest-specific 5 (non-protein coding)                 | 60674  |
| 128 | GATM      | Glycine amidinotransferase                                    | 2628   |
| 129 | GBP1      | Guanylate binding protein 1, interferon-inducible             | 2633   |
| 130 | GJD3      | Gap junction protein, delta 3, 31.9kDa                        | 125111 |
| 131 | GLP1R     | Glucagon-like peptide 1 receptor                              | 2740   |
| 132 | GLRX3     | Glutaredoxin 3                                                | 10539  |
| 133 | GP2       | Glycoprotein 2 (zymogen granule membrane)                     | 2813   |
| 134 | GPNMB     | Glycoprotein (transmembrane) nmb                              | 10457  |
| 135 | GPR126    | G protein-coupled receptor 126                                | 57211  |
| 136 | GPR137B   | G protein-coupled receptor 137B                               | 7107   |
| 137 | GPRC6A    | G protein-coupled receptor, family C, group 6, member A       | 222545 |
| 138 | GSN       | Gelsolin                                                      | 2934   |
| 139 | GSTCD     | Glutathione S-transferase, C-terminal domain containing       | 79807  |
| 140 | GTF3C3    | General transcription factor IIIC, polypeptide 3, 102kDa      | 9330   |
| 141 | H2AFX     | H2A histone family, member X                                  | 3014   |
| 142 | HAMP      | Hepcidin antimicrobial peptide                                | 57817  |
| 143 | HDAC4     | Histone deacetylase 4                                         | 9759   |
| 144 | HERC2     | HECT and RLD domain containing E3 ubiquitin protein ligase 2  | 8924   |
| 145 | HHIP      | Hedgehog interacting protein                                  | 64399  |
| 146 | HIST1H2BK | Histone cluster 1, H2bk                                       | 85236  |
| 147 | HJURP     | Holliday junction recognition protein                         | 55355  |
| 148 | HLA-A     | Major histocompatibility complex, class I, A                  | 3105   |
| 149 | HLA-DRA   | Major histocompatibility complex, class II, DR alpha          | 3122   |
| 150 | HLA-DRB5  | Major histocompatibility complex, class II, DR beta 5         | 3127   |
| 151 | HP        | Haptoglobin                                                   | 3240   |
| 152 | HTR4      | 5-hydroxytryptamine (serotonin) receptor 4, G protein-coupled | 3360   |
| 153 | IFI44     | Interferon-induced protein 44                                 | 10561  |
| 154 | IFNG      | Interferon, gamma                                             | 3458   |
| 155 | IGFBP6    | Insulin-like growth factor binding protein 6                  | 3489   |
| 156 | IGSF10    | Immunoglobulin superfamily, member 10                         | 285313 |
| 157 | IL10      | Interleukin 10                                                | 3586   |
| 158 | IL12B     | Interleukin 12B                                               | 3593   |
| 159 | IL13      | Interleukin 13                                                | 3596   |
| 160 | IL18R1    | Interleukin 18 receptor 1                                     | 8809   |
| 161 | IL1A      | Interleukin 1, alpha                                          | 3552   |
| 162 | IL1B      | Interleukin 1, beta                                           | 3553   |
| 163 | IL23      | Interleukin 23, alpha subunit p19                             | 51561  |

|     |        |                                                                 |        |
|-----|--------|-----------------------------------------------------------------|--------|
| 164 | IL33   | Interleukin 33                                                  | 90865  |
| 165 | IL4    | Interleukin 4                                                   | 3565   |
| 166 | IL6    | Interleukin 6 (interferon, beta 2)                              | 3569   |
| 167 | INCENP | Inner centromere protein antigens 135/155kda                    | 3619   |
| 168 | INMT   | Indolethylamine N-methyltransferase                             | 11185  |
| 169 | IRF1   | Interferon regulatory factor 1                                  | 3659   |
| 170 | ITGAX  | Integrin, alpha X (complement component 3 receptor 4 subunit)   | 3687   |
| 171 | ITGB6  | Integrin, beta 6                                                | 3694   |
| 172 | KCNE2  | Potassium voltage-gated channel, Isk-related family, member 2   | 9992   |
| 173 | KCNJ15 | Potassium inwardly-rectifying channel, subfamily J, member 15   | 3772   |
| 174 | KHNYN  | KH and NYN domain containing                                    | 23351  |
| 175 | KIF1A  | Kinesin family member 1A                                        | 547    |
| 176 | KIT    | V-kit sarcoma viral oncogene homolog                            | 3815   |
| 177 | KLHL6  | Kelch-like 6 (Drosophila)                                       | 89857  |
| 178 | KLK1   | Kallikrein 1                                                    | 3816   |
| 179 | KPNA6  | Karyopherin alpha 6 (importin alpha 7)                          | 23633  |
| 180 | KRT79  | Keratin 79                                                      | 338785 |
| 181 | LAMP3  | Lysosomal-associated membrane protein 3                         | 27074  |
| 182 | LAPTM5 | Lysosomal protein transmembrane 5                               | 7805   |
| 183 | LBP    | Lipopolysaccharide binding protein                              | 3929   |
| 184 | LECT1  | Leukocyte cell derived chemotaxin 1                             | 11061  |
| 185 | LEPR   | Leptin receptor                                                 | 3953   |
| 186 | LILRA5 | Leukocyte immunoglobulin-like receptor, subfamily A, member 5   | 353514 |
| 187 | LILRB4 | Leukocyte immunoglobulin-like receptor, subfamily B, member 4   | 11006  |
| 188 | LMO7   | LIM domain 7                                                    | 4008   |
| 189 | LPP    | LIM domain containing preferred translocation partner in lipoma | 4026   |
| 190 | LRP1   | Low density lipoprotein receptor-related protein 1              | 4035   |
| 191 | LRRC33 | Leucine rich repeat containing 33                               | 375387 |
| 192 | LRRC6  | Leucine rich repeat containing 6                                | 23639  |
| 193 | LUM    | Lumican                                                         | 4060   |
| 194 | LY75   | Lymphocyte antigen 75                                           | 4065   |
| 195 | LYVE1  | Lymphatic vessel endothelial hyaluronan receptor 1              | 10894  |
| 196 | MAP3K6 | Mitogen-activated protein kinase kinase kinase 6                | 9064   |
| 197 | MC5R   | Melanocortin 5 receptor                                         | 4161   |
| 198 | MCEMP1 | Mast cell expressed membrane protein 1                          | 199675 |
| 199 | MCL1   | Myeloid cell leukemia sequence 1 (BCL2-related)                 | 4170   |
| 200 | MCRS1  | Microspherule protein 1                                         | 10445  |
| 201 | MECOM  | MDS1 and EVI1 complex locus                                     | 2122   |
| 202 | MEX3A  | Mex-3 homolog A (C. Elegans)                                    | 92312  |
| 203 | MFAP2  | Microfibrillar-associated protein 2                             | 4237   |

|     |         |                                                              |        |
|-----|---------|--------------------------------------------------------------|--------|
| 204 | MLC1    | Megalencephalic leukoencephalopathy with subcortical cysts 1 | 23209  |
| 205 | MMP15   | Matrix metalloproteinase 15 (membrane-inserted)              | 4324   |
| 206 | MMP3    | Matrix metalloproteinase 3 (stromelysin 1, progelatinase)    | 4314   |
| 207 | MPEG1   | Macrophage expressed 1                                       | 219972 |
| 208 | MRC1    | Mannose receptor, C type 1                                   | 4360   |
| 209 | MRC2    | Mannose receptor, C type 2                                   | 9902   |
| 210 | MRPL21  | Mitochondrial ribosomal protein L21                          | 219927 |
| 211 | MRPS17  | Mitochondrial ribosomal protein S17                          | 51373  |
| 212 | MSLN    | Mesothelin                                                   | 10232  |
| 213 | MSR1    | Macrophage scavenger receptor 1                              | 4481   |
| 214 | MX2     | Myxovirus (influenza virus) resistance 2 (mouse)             | 4600   |
| 215 | MYBPC1  | Myosin binding protein C, slow type                          | 4604   |
| 216 | NAAA    | N-acylethanolamine acid amidase                              | 27163  |
| 217 | NCR3    | Natural cytotoxicity triggering receptor 3                   | 259197 |
| 218 | NDNF    | Neuron-derived neurotrophic factor                           | 79625  |
| 219 | NEAT1   | Nuclear paraspeckle assembly transcript 1                    | 283131 |
| 220 | NEB     | Nebulin                                                      | 4703   |
| 221 | NELL1   | NEL-like 1 (chicken)                                         | 4745   |
| 222 | NETO2   | Neuropilin (NRP) and tolloid (TLL)-like 2                    | 81831  |
| 223 | NHSL2   | NHS-like 2                                                   | 340527 |
| 224 | NME7    | NME/NM23 family member 7                                     | 29922  |
| 225 | NPPA    | Natriuretic peptide A                                        | 4878   |
| 226 | NR1D2   | Nuclear receptor subfamily 1, group D, member 2              | 9975   |
| 227 | NRROS   | Negative regulator of reactive oxygen species                | 375387 |
| 228 | OAS2    | 2'-5'-oligoadenylate synthetase 2, 69/71kDa                  | 4939   |
| 229 | OLR1    | Oxidized low density lipoprotein (lectin-like) receptor 1    | 4973   |
| 230 | OSMR    | Oncostatin M receptor                                        | 9180   |
| 231 | OVOS2   | Ovostatin 2                                                  | 144203 |
| 232 | PAPSS2  | 3'-phosphoadenosine 5'-phosphosulfate synthase 2             | 9060   |
| 233 | PDE4A   | Phosphodiesterase 4A, cAMP-specific                          | 5141   |
| 234 | PDLIM3  | PDZ and LIM domain 3                                         | 27295  |
| 235 | PEG10   | Paternally expressed 10                                      | 23089  |
| 236 | PER3    | Period homolog 3 (Drosophila)                                | 8863   |
| 237 | PID1    | Phosphotyrosine interaction domain containing 1              | 55022  |
| 238 | PLAT    | Plasminogen activator, tissue                                | 5327   |
| 239 | PLET1   | Placenta expressed transcript 1                              | 349633 |
| 240 | PLPPR5  | Phospholipid phosphatase related 5                           | 163404 |
| 241 | PON3    | Paraoxonase 3                                                | 5446   |
| 242 | POP4    | Processing of precursor 4, ribonuclease P/MRP subunit        | 10775  |
| 243 | PPARG   | Peroxisome proliferator-activated receptor gamma             | 5468   |
| 244 | PPIC    | Peptidylprolyl isomerase C (cyclophilin C)                   | 5480   |
| 245 | PPP1R21 | Protein phosphatase 1, regulatory subunit 21                 | 129285 |
| 246 | PPP1R3A | Protein phosphatase 1, regulatory subunit 3A                 | 5506   |

|     |          |                                                                                               |        |
|-----|----------|-----------------------------------------------------------------------------------------------|--------|
| 247 | PPT2     | Palmitoyl-protein thioesterase 2                                                              | 9374   |
| 248 | PRELP    | Proline/arginine-rich end leucine-rich repeat protein                                         | 5549   |
| 249 | PRG4     | Proteoglycan 4                                                                                | 10216  |
| 250 | PRKAR2A  | Protein kinase, camp-dependent, regulatory, type II, alpha                                    | 5576   |
| 251 | PRKG2    | Protein kinase, cgmp-dependent, type II                                                       | 5593   |
| 252 | PSCA     | Prostate stem cell antigen                                                                    | 8000   |
| 253 | PTCH1    | Patched 1                                                                                     | 5727   |
| 254 | PTGR1    | Prostaglandin reductase 1                                                                     | 22949  |
| 255 | RAD54L2  | RAD54-like 2 (S. Cerevisiae)                                                                  | 23132  |
| 256 | RAD9B    | RAD9 homolog B (S. pombe)                                                                     | 144715 |
| 257 | RARB     | Retinoic acid receptor, beta                                                                  | 5915   |
| 258 | RCAN2    | Regulator of calcineurin 2                                                                    | 10231  |
| 259 | REG3G    | Regenerating islet-derived 3 gamma                                                            | 130120 |
| 260 | RETNLB   | Resistin like beta                                                                            | 84666  |
| 261 | RGS18    | Regulator of G-protein signaling 18                                                           | 64407  |
| 262 | RGS4     | Regulator of G-protein signaling 4                                                            | 5999   |
| 263 | ROS1     | C-ros oncogene 1 , receptor tyrosine kinase                                                   | 6098   |
| 264 | RPL28    | Ribosomal protein L28                                                                         | 6158   |
| 265 | RSPH1    | Radial spoke head 1 homolog (Chlamydomonas)                                                   | 89765  |
| 266 | S100A6   | S100 calcium binding protein A6                                                               | 6277   |
| 267 | SAMD9L   | Sterile alpha motif domain containing 9-like                                                  | 219285 |
| 268 | SCARB1   | Scavenger receptor class B, member 1                                                          | 949    |
| 269 | SCEL     | Sciellin                                                                                      | 8796   |
| 270 | SCGB1A1  | Secretoglobin, family 1A, member 1 (uteroglobin)                                              | 7356   |
| 271 | SCGB1C1  | Secretoglobin, family 1C, member 1                                                            | 147199 |
| 272 | SCN3A    | Sodium channel, voltage-gated, type III, alpha subunit                                        | 6328   |
| 273 | SCN7A    | Sodium channel, voltage-gated, type VII, alpha subunit                                        | 6332   |
| 274 | SCNN1A   | Sodium channel, non-voltage-gated 1 alpha subunit                                             | 6337   |
| 275 | SCNN1G   | Sodium channel, non-voltage-gated 1, gamma subunit                                            | 6340   |
| 276 | SEC14L3  | SEC14-like 3 (S. cerevisiae)                                                                  | 266629 |
| 277 | SEMA3E   | Sema domain, immunoglobulin domain (Ig), short basic domain, secreted, (semaphorin) 3E        | 9723   |
| 278 | SEMA7A   | Semaphorin 7A, GPI membrane anchor                                                            | 8482   |
| 279 | SERPINE1 | Serpin peptidase inhibitor, clade E (nexin, plasminogen activator inhibitor type 1), member 1 | 5054   |
| 280 | SETD5    | SET domain containing 5                                                                       | 55209  |
| 281 | SFMBT2   | Scm-like with four mbt domains 2                                                              | 57713  |
| 282 | SFTA2    | Surfactant associated 2                                                                       | 389376 |
| 283 | SFTPA1   | Surfactant protein A1                                                                         | 653509 |
| 284 | SFTPC    | Surfactant protein C                                                                          | 6440   |
| 285 | SLC13A4  | Solute carrier family 13 (sodium/sulfate symporters), member 4                                | 26266  |
| 286 | SLC16A7  | Solute carrier family 16, member 7                                                            | 9194   |
| 287 | SLC1A4   | Solute carrier family 1, member 4                                                             | 6509   |



|     |                    |                                                                                                              |           |
|-----|--------------------|--------------------------------------------------------------------------------------------------------------|-----------|
| 288 | SLC22A24/<br>NET46 | Solute carrier family 22, member 24                                                                          | 283238    |
| 289 | SLC24A4            | Solute carrier family 24 (sodium/potassium/calcium exchanger), member 4                                      | 123041    |
| 290 | SLC34A2            | Solute carrier family 34 (sodium phosphate), member 2                                                        | 10568     |
| 291 | SLC36A2            | Solute carrier family 36 (proton/amino acid symporter), member 2                                             | 153201    |
| 292 | SLC39A8            | Solute carrier family 39 (zinc transporter), member 8                                                        | 64116     |
| 293 | SLFN5              | Schlafen family member 5                                                                                     | 162394    |
| 294 | SLFN12L            | Schlafen family member 12 like                                                                               | 100506736 |
| 295 | SLURP1             | Secreted LY6/PLAUR domain containing 1                                                                       | 57152     |
| 296 | SNX10              | Sorting nexin 10                                                                                             | 29887     |
| 297 | SOD3               | Superoxide dismutase 3, extracellular                                                                        | 6649      |
| 298 | SPATA9             | Spermatogenesis associated 9                                                                                 | 83890     |
| 299 | SPCS3              | Signal peptidase complex subunit 3 homolog (S. Cerevisiae)                                                   | 60559     |
| 300 | SPEN               | Spen homolog, transcriptional regulator (Drosophila)                                                         | 23013     |
| 301 | SPINK5             | Serine peptidase inhibitor, Kazal type 5                                                                     | 11005     |
| 302 | SPP1               | Secreted phosphoprotein 1                                                                                    | 6696      |
| 303 | SREK1              | Splicing regulatory glutamine/lysine-rich protein 1                                                          | 140890    |
| 304 | ST6GALNAC2         | ST6 (alpha-N-acetyl-neuraminy-2,3-beta-galactosyl-1,3)-N-acetylgalactosaminide alpha-2,6-sialyltransferase 2 | 10610     |
| 305 | STBD1              | Starch binding domain 1                                                                                      | 8987      |
| 306 | STMN2              | Stathmin-like 2                                                                                              | 11075     |
| 307 | STRA13             | Stimulated by retinoic acid 13 homolog (mouse)                                                               | 201254    |
| 308 | STX8               | Syntaxin 8                                                                                                   | 9482      |
| 309 | SYCE1              | Synaptonemal complex central element protein 1                                                               | 93426     |
| 310 | SYCP3              | Synaptonemal complex protein 3                                                                               | 50511     |
| 311 | TC2N               | Tandem C2 domains, nuclear                                                                                   | 123036    |
| 312 | TCF20              | Transcription factor 20 (AR1)                                                                                | 6942      |
| 313 | TECRL              | Trans-2,3-enoyl-coa reductase-like                                                                           | 253017    |
| 314 | TF                 | Transferrin                                                                                                  | 7018      |
| 315 | TFF2               | Trefoil factor 2                                                                                             | 7032      |
| 316 | TGFB2              | Transforming growth factor, beta 2                                                                           | 7042      |
| 317 | TGM2               | Transglutaminase 2                                                                                           | 7052      |
| 318 | THSD4              | Thrombospondin, type I, domain containing 4                                                                  | 79875     |
| 319 | TIFAB              | TRAF-interacting protein with forkhead-associated domain, family member B                                    | 497189    |
| 320 | TINAG              | Tubulointerstitial nephritis antigen                                                                         | 27283     |
| 321 | TLE3               | Transducin-like enhancer of split 3 (E(sp1) homolog, Drosophila)                                             | 7090      |
| 322 | TLR2               | Toll-like receptor 2                                                                                         | 7097      |
| 323 | TLR8               | Toll-like receptor 8                                                                                         | 51311     |
| 324 | TM4SF1             | Transmembrane 4 L six family member 1                                                                        | 4071      |
| 325 | TMEM139            | Transmembrane protein 139                                                                                    | 135932    |
| 326 | TMEM178A           | Transmembrane protein 178A                                                                                   | 130733    |

|     |          |                                                                |        |
|-----|----------|----------------------------------------------------------------|--------|
| 327 | TMEM181  | Transmembrane protein 181                                      | 57583  |
| 328 | TMEM2    | Transmembrane protein 2                                        | 23670  |
| 329 | TMSB4X   | Thymosin beta 4, X-linked                                      | 7114   |
| 330 | TNF      | Tumor necrosis factor                                          | 7124   |
| 331 | TNFRSF1B | TNF receptor superfamily member 1B                             | 7133   |
| 332 | TNNC2    | Troponin C type 2 (fast)                                       | 7125   |
| 333 | TNNT3    | Troponin T type 3 (skeletal, fast)                             | 7140   |
| 334 | TNS1     | Tensin 1                                                       | 7145   |
| 335 | TRABD2B  | TraB domain containing 2B                                      | 388630 |
| 336 | TRIM56   | Tripartite motif containing 56                                 | 81844  |
| 337 | TRRAP    | Transformation/transcription domain-associated protein         | 8295   |
| 338 | TTC5     | Tetratricopeptide repeat domain 5                              | 91875  |
| 339 | TYROBP   | TYRO protein tyrosine kinase binding protein                   | 7305   |
| 340 | UACA     | Uveal autoantigen with coiled-coil domains and ankyrin repeats | 55075  |
| 341 | UBAP2L   | Ubiquitin associated protein 2-like                            | 9898   |
| 342 | UBR4     | Ubiquitin protein ligase E3 component n-recogin 4              | 23352  |
| 343 | UGGT2    | UDP-glucose glycoprotein glucosyltransferase 2                 | 55757  |
| 344 | UPK1B    | Uroplakin 1B                                                   | 7348   |
| 345 | VCAM1    | Vascular cell adhesion molecule 1                              | 7412   |
| 346 | VEGFC    | Vascular endothelial growth factor C                           | 7424   |
| 347 | VEPH1    | Ventricular zone expressed PH domain homolog 1 (zebrafish)     | 79674  |
| 348 | VPREB3   | Pre-B lymphocyte 3                                             | 29802  |
| 349 | VPS28    | Vacuolar protein sorting 28 homolog (S. Cerevisiae)            | 51160  |
| 350 | WDR45    | WD repeat domain 45                                            | 11152  |
| 351 | WIF1     | WNT inhibitory factor 1                                        | 11197  |
| 352 | XDH      | Xanthine dehydrogenase                                         | 7498   |
| 353 | ZKSCAN3  | Zinc finger with KRAB and SCAN domains 3                       | 80317  |
| 354 | ZXDB     | Zinc finger, X-linked, duplicated B                            | 158586 |
| 355 | ZZEF1    | Zinc finger, ZZ-type with EF-hand domain 1                     | 23140  |

**Supplementary table ST2:** Summary of the transcript (Gene Paint; mouse embryo) and protein (Human Protein Atlas) expression domains of the significantly associated chronic obstructive pulmonary disease (COPD) genes.

| Protein                    | Gene Paint<br>[Mouse embryonic<br>(E) lung] | Staining intensities in Human Lung (Human Protein Atlas) |                           |                                                     |                                                  |
|----------------------------|---------------------------------------------|----------------------------------------------------------|---------------------------|-----------------------------------------------------|--------------------------------------------------|
|                            | Pseudoglandular<br>stage (E14.5)            | Human Lung<br>Macrophages                                | Human Lung<br>Pneumocytes | Human Nasopharynx<br>(Respiratory epithelial cells) | Human Bronchus<br>(Respiratory epithelial cells) |
| <b>ABCA10<br/>(ABCA8A)</b> | Not detectable                              | Medium                                                   | Not detectable            | Medium                                              | High                                             |
| <b>ADAM19</b>              | Detectable                                  | Not detectable                                           | Not detectable            | Low                                                 | Not detectable                                   |
| <b>BHLHE41</b>             | Not detectable                              | Not detectable                                           | Not detectable            | Not detectable                                      | Not detectable                                   |
| <b>CD200</b>               | Detectable                                  | Medium                                                   | High                      | Medium                                              | Medium                                           |
| <b>CYBB</b>                | Detectable                                  | Not detectable                                           | Not detectable            | Not detectable                                      | Low                                              |
| <b>GATM</b>                | Not detectable                              | Not detectable                                           | Not detectable            | Not detectable                                      | Not detectable                                   |
| <b>GBP1</b>                | Not detectable                              | Low                                                      | Not detectable            | Not detectable                                      | Not detectable                                   |
| <b>HJURP<br/>(MFLEG1)</b>  | Detectable                                  | Medium                                                   | Low                       | Medium                                              | Medium                                           |
| <b>KIT</b>                 | Detectable                                  | Medium                                                   | Not detectable            | Not detectable                                      | Not detectable                                   |
| <b>LEPR</b>                | Detectable                                  | Medium                                                   | Not detectable            | Medium                                              | Medium                                           |
| <b>LMO7</b>                | Detectable                                  | Not detectable                                           | High                      | High                                                | High                                             |
| <b>LRP1</b>                | Detectable                                  | Medium                                                   | Low                       | Low                                                 | Not detectable                                   |
| <b>MCRS1</b>               | Detectable                                  | Medium                                                   | High                      | High                                                | Medium                                           |
| <b>POP4</b>                | Detectable                                  | Medium                                                   | Not detectable            | Medium                                              | Medium                                           |
| <b>PTCH1</b>               | Detectable                                  | Medium                                                   | Medium                    | High                                                | Medium                                           |
| <b>SCN7A</b>               | Not detectable                              | High                                                     | High                      | Medium                                              | Medium                                           |
| <b>SLFN12L</b>             | Not detectable                              | Medium                                                   | Low                       | Low                                                 | Medium                                           |
| <b>TLR8</b>                | Not detectable                              | High                                                     | Not detectable            | Low                                                 | Low                                              |
| <b>TTC5</b>                | Not detectable                              | Medium                                                   | Low                       | Medium                                              | Medium                                           |
| <b>VEPH1</b>               | Not detectable                              | Medium                                                   | Low                       | Medium                                              | Medium                                           |

**Supplementary table ST3:** Analysis of lung transcript expression of the associated 20 genes in chronic obstructive pulmonary disease (COPD) and/ or emphysematous lung tissues using available datasets [GSE: 29133, 22148, 1650, 47460 and 54837] in Genome Expression Omnibus (GEO) database. ↓: Decreased ↑: Increased ✓: significantly altered

| Associated Genes | COPD alveolar epithelial type-II cells<br>GSE: 29133<br>Fujino et al., 2012 | COPD stage 2 to 4 compared among each other<br>GSE: 22148<br>Dave et al., 2011 |                    |                    | Smokers with severe emphysema<br>GSE: 1650<br>Spira et al., 2004 | 4 stages of COPD compared to controls COPD<br>GSE: 47460<br>Peng et al., 2016 |                                            |                    |                    | Stage 2 to 4 compared to stage 1 COPD<br>GSE: 54837<br>Singh et al., 2014 |                    |                    |
|------------------|-----------------------------------------------------------------------------|--------------------------------------------------------------------------------|--------------------|--------------------|------------------------------------------------------------------|-------------------------------------------------------------------------------|--------------------------------------------|--------------------|--------------------|---------------------------------------------------------------------------|--------------------|--------------------|
|                  |                                                                             | Case compared to control                                                       | Stage 3 vs stage 2 | Stage 4 vs stage 2 |                                                                  | Stage 4 vs stage 3                                                            | Emphysema vs Non-emphysematous lung tissue | Stage 1 vs control | Stage 2 vs control | Stage 3 vs control                                                        | Stage 4 vs control | Stage 2 vs stage 1 |
| <i>ABCA10</i>    |                                                                             |                                                                                |                    |                    |                                                                  |                                                                               |                                            |                    | ↓✓                 |                                                                           |                    |                    |
| <i>ADAM19</i>    |                                                                             |                                                                                |                    |                    |                                                                  |                                                                               |                                            |                    | ↑✓                 |                                                                           |                    |                    |
| <i>BHLHE41</i>   | ↓✓                                                                          | ↓✓                                                                             | ↓✓                 |                    |                                                                  | ↑✓                                                                            | ↑✓                                         |                    |                    |                                                                           | ↓✓                 |                    |
| <i>CD200</i>     |                                                                             | ↑✓                                                                             |                    |                    |                                                                  |                                                                               |                                            |                    |                    |                                                                           |                    |                    |
| <i>CYBB</i>      | ↑✓                                                                          | ↓✓                                                                             | ↓✓                 |                    |                                                                  | ↑✓                                                                            | ↑✓                                         |                    | ↑✓                 | ↑✓                                                                        | ↑✓                 | ↑✓                 |
| <i>GATM</i>      |                                                                             | ↓✓                                                                             |                    |                    | ↑✓                                                               | ↑✓                                                                            |                                            |                    |                    |                                                                           |                    | ↑✓                 |
| <i>GBP1</i>      | ↑✓                                                                          |                                                                                |                    |                    |                                                                  |                                                                               |                                            |                    |                    | ↑✓                                                                        | ↑✓                 |                    |
| <i>HJURP</i>     |                                                                             |                                                                                | ↓✓                 |                    |                                                                  |                                                                               |                                            |                    |                    |                                                                           |                    |                    |
| <i>KIT</i>       |                                                                             |                                                                                |                    |                    |                                                                  | ↑✓                                                                            |                                            |                    |                    |                                                                           |                    |                    |
| <i>LEPR</i>      |                                                                             |                                                                                |                    |                    |                                                                  |                                                                               | ↓✓                                         |                    | ↓✓                 |                                                                           |                    |                    |
| <i>LMO7</i>      |                                                                             | ↓✓                                                                             | ↓✓                 |                    |                                                                  |                                                                               |                                            |                    |                    |                                                                           | ↓✓                 | ↓✓                 |
| <i>LRP1</i>      |                                                                             | ↓✓                                                                             | ↓✓                 |                    | ↓✓                                                               |                                                                               | ↑✓                                         |                    |                    |                                                                           | ↑✓                 | ↑✓                 |
| <i>MCRS1</i>     |                                                                             | ↓✓                                                                             |                    |                    |                                                                  |                                                                               |                                            |                    |                    |                                                                           |                    |                    |
| <i>POP4</i>      |                                                                             | ↓✓                                                                             | ↓✓                 |                    |                                                                  |                                                                               |                                            |                    |                    | ↑✓                                                                        |                    |                    |
| <i>PTCH1</i>     |                                                                             | ↓✓                                                                             | ↓✓                 | ↓✓                 |                                                                  |                                                                               |                                            |                    |                    |                                                                           | ↓✓                 |                    |
| <i>SCN7A</i>     |                                                                             | ↑✓                                                                             |                    |                    |                                                                  |                                                                               |                                            |                    |                    |                                                                           |                    |                    |
| <i>SLFN12L</i>   |                                                                             |                                                                                |                    |                    |                                                                  |                                                                               |                                            |                    |                    |                                                                           |                    |                    |
| <i>TLR8</i>      |                                                                             |                                                                                |                    |                    |                                                                  | ↑✓                                                                            | ↑✓                                         |                    |                    |                                                                           |                    | ↑✓                 |
| <i>TTC5</i>      |                                                                             |                                                                                |                    |                    |                                                                  |                                                                               |                                            |                    |                    |                                                                           | ↓✓                 |                    |
| <i>VEPH1</i>     |                                                                             |                                                                                |                    | ↓✓                 |                                                                  |                                                                               |                                            | ↓✓                 |                    |                                                                           | ↑✓                 |                    |

**Supplementary table ST4:** Analysis of l transcript expression of the associated 20 genes in mouse cigarette smoke exposed lungs using available datasets [GSE: 8790, 7310, 17737, and 6205] in Genome Expression Omnibus (GEO) database. ↓: **Decreased** ↑: **Increased** ✓: **significantly altered**

| Associated Genes                                 | Cigarette smoke (CS) induced emphysema<br>GSE: 8790<br>Rangaswamy et al., 2009<br>(CS exposed vs control) |            |          | Cigarette smoke exposed neonatal mice<br>GSE: 7310<br>McGrath-Morrow et al., 2007<br>CS exposed vs control | Nose-only exposure of 4% mainstream cigarette smoke<br>GSE: 17737<br>Contribution by Hu G and Podolin P<br><a href="https://www.ncbi.nlm.nih.gov/geo/query/acc.cgi?acc=GSE17737">https://www.ncbi.nlm.nih.gov/geo/query/acc.cgi?acc=GSE17737</a><br>(CS exposed vs control) |             |          | Gene expression analysis using lung transcriptomes in response to cigarette smoke-<br>GSE:76205<br>Miller et al., 2017<br>(CS exposed vs control) |       |         |          |          |          |
|--------------------------------------------------|-----------------------------------------------------------------------------------------------------------|------------|----------|------------------------------------------------------------------------------------------------------------|-----------------------------------------------------------------------------------------------------------------------------------------------------------------------------------------------------------------------------------------------------------------------------|-------------|----------|---------------------------------------------------------------------------------------------------------------------------------------------------|-------|---------|----------|----------|----------|
|                                                  | 8 days                                                                                                    | 1.5 months | 6 months |                                                                                                            | 2 weeks                                                                                                                                                                                                                                                                     | 12 weeks CS | 24 weeks | 1 day                                                                                                                                             | 7 day | 1 month | 3 months | 6 months | 9 months |
| <i>Abca8a</i><br>(Human ortholog <i>ABCA10</i> ) |                                                                                                           | ↓✓         |          |                                                                                                            |                                                                                                                                                                                                                                                                             | ↓✓          | ↓✓       |                                                                                                                                                   |       |         |          |          |          |
| <i>Adam19</i>                                    |                                                                                                           |            |          | ↑✓                                                                                                         |                                                                                                                                                                                                                                                                             | ↑✓          | ↑✓       |                                                                                                                                                   |       |         |          |          |          |
| <i>Bhlhe41</i>                                   |                                                                                                           |            |          |                                                                                                            | ↑✓                                                                                                                                                                                                                                                                          |             |          |                                                                                                                                                   | ↑✓    | ↑✓      | ↑✓       |          | ↑✓       |
| <i>Cd200</i>                                     | ↓✓                                                                                                        | ↓✓         |          |                                                                                                            |                                                                                                                                                                                                                                                                             |             |          |                                                                                                                                                   |       |         | ↑✓       |          |          |
| <i>Cybb</i>                                      |                                                                                                           |            |          |                                                                                                            | ↑✓                                                                                                                                                                                                                                                                          | ↑✓          | ↑✓       |                                                                                                                                                   |       |         |          |          |          |
| <i>Gatm</i>                                      |                                                                                                           |            |          | ↓✓                                                                                                         | ↑✓                                                                                                                                                                                                                                                                          | ↑✓          | ↑✓       |                                                                                                                                                   |       |         |          |          |          |
| <i>Gbp1</i>                                      |                                                                                                           |            |          |                                                                                                            |                                                                                                                                                                                                                                                                             |             |          |                                                                                                                                                   |       |         |          |          |          |
| <i>Hjurp</i>                                     |                                                                                                           |            | ↓✓       |                                                                                                            |                                                                                                                                                                                                                                                                             | ↓✓          |          |                                                                                                                                                   |       |         |          |          |          |
| <i>Kit</i>                                       | ↓✓                                                                                                        |            |          |                                                                                                            | ↑✓                                                                                                                                                                                                                                                                          |             |          |                                                                                                                                                   |       |         |          |          |          |
| <i>Lepr</i>                                      | ↓✓                                                                                                        |            |          | ↑✓                                                                                                         | ↑✓                                                                                                                                                                                                                                                                          | ↓✓          | ↓✓       |                                                                                                                                                   |       |         | ↑✓       |          |          |
| <i>Lmo7</i>                                      | ↓✓                                                                                                        |            |          |                                                                                                            |                                                                                                                                                                                                                                                                             |             | ↓✓       |                                                                                                                                                   |       |         | ↑✓       |          |          |
| <i>Lrp1</i>                                      |                                                                                                           |            |          |                                                                                                            | ↑✓                                                                                                                                                                                                                                                                          |             |          |                                                                                                                                                   |       |         |          |          |          |
| <i>Mcrs1</i>                                     |                                                                                                           |            |          |                                                                                                            |                                                                                                                                                                                                                                                                             |             |          |                                                                                                                                                   |       |         |          |          |          |
| <i>Pop4</i>                                      |                                                                                                           |            |          |                                                                                                            |                                                                                                                                                                                                                                                                             |             | ↑✓       |                                                                                                                                                   |       |         |          |          |          |
| <i>Ptch1</i>                                     |                                                                                                           |            |          |                                                                                                            |                                                                                                                                                                                                                                                                             |             |          |                                                                                                                                                   |       |         |          |          |          |
| <i>Scn7a</i>                                     | ↓✓                                                                                                        | ↑✓         | ↓✓       |                                                                                                            |                                                                                                                                                                                                                                                                             | ↓✓          | ↓✓       |                                                                                                                                                   |       |         | ↑✓       |          |          |
| <i>Slfn12l</i>                                   |                                                                                                           |            |          |                                                                                                            |                                                                                                                                                                                                                                                                             |             |          |                                                                                                                                                   |       |         |          |          |          |
| <i>Tlr8</i>                                      |                                                                                                           |            |          |                                                                                                            |                                                                                                                                                                                                                                                                             |             | ↑✓       |                                                                                                                                                   | ↑✓    |         |          |          |          |
| <i>Ttc5</i>                                      |                                                                                                           |            |          |                                                                                                            |                                                                                                                                                                                                                                                                             |             |          |                                                                                                                                                   |       |         |          |          |          |
| <i>Veph1</i>                                     |                                                                                                           |            |          |                                                                                                            |                                                                                                                                                                                                                                                                             |             |          |                                                                                                                                                   |       |         | ↑✓       |          |          |

**Supplementary table ST5:** The difference in minor allele frequencies of the associated single nucleotide polymorphisms (SNPs) between Korean population and global population indicates the influence of ethnicity on the findings. The Korean population data was accessed from the KoreanDB: <http://152.99.75.168/KRGDB/menuPages/firstInfo.jsp> and <http://152.99.75.168/KRGDB/browser/mainBrowser.jsp> Global SNP data(dbSNP database): <https://www.ncbi.nlm.nih.gov/SNP/>

| <b>Gene</b>           | <b>Associated SNP</b> | <b>Korean DB<br/>Alt Allele<br/>frequency<br/>(662 samples)</b> | <b>Korean DB<br/>Alt Allele<br/>frequency<br/>(1100 samples)</b> | <b>dbSNP<br/>Global Alt Allele<br/>frequency/sample<br/>size</b> |
|-----------------------|-----------------------|-----------------------------------------------------------------|------------------------------------------------------------------|------------------------------------------------------------------|
| <b><i>ABCA10</i></b>  | rs4968849             | 0.42                                                            | 0.42                                                             | A=0.2887/1446                                                    |
| <b><i>ADAM19</i></b>  | rs1422795             | 0.14                                                            | 0.17                                                             | C=0.4145/2076                                                    |
| <b><i>BHLHE41</i></b> | rs11048413            | 0.2                                                             | 0.1                                                              | A=0.3706/1856                                                    |
| <b><i>CD200</i></b>   | rs1131199             | 0.7                                                             | 0.76                                                             | C=0.3397/1701                                                    |
| <b><i>GATM</i></b>    | rs1288775             | 0.85                                                            | 0.84                                                             | T=0.3814/1910                                                    |
| <b><i>GBP1</i></b>    | rs1048425             | 0.54                                                            | 0.53                                                             | G=0.2817/1411                                                    |
| <b><i>HJURP</i></b>   | rs2286430             | 0.39                                                            | 0.4                                                              | T=0.3460/1733                                                    |
| <b><i>KIT</i></b>     | rs3822214             | 0.03                                                            | 0.03                                                             | C=0.0645/323                                                     |
| <b><i>LEPR</i></b>    | rs1137101             | 0.86                                                            | 0.83                                                             | A=0.4157/2082                                                    |
| <b><i>SCN7A</i></b>   | rs7565062             | 0.67                                                            | 0.67                                                             | G=0.3113/1559                                                    |
| <b><i>SCN7A</i></b>   | rs6738031             | 0.66                                                            | 0.66                                                             | C=0.2554/1279                                                    |
| <b><i>SLFN12L</i></b> | rs2304968             | 0.72                                                            | 0.7                                                              | T=0.2452/1228                                                    |
| <b><i>TLR8</i></b>    | rs3764880             | 0.82                                                            | 0.75                                                             | G=0.4638/1751                                                    |
| <b><i>TTC5</i></b>    | rs3742945             | 0.83                                                            | 0.82                                                             | T=0.2544/1274                                                    |
| <b><i>VEPH1</i></b>   | rs11918974            | 0.38                                                            | 0.39                                                             | G=0.2506/1255                                                    |

**Supplementary Figure S1:** Analysis of protein domain and functional sites in the “A Disintegrin and metallopeptidase domain 19” (ADAM19)

## ADAM19 (A Disintegrin And Metallopeptidase domain 19)

| SNP       | Genomic location    | Ref amino acid-<br>Position-<br>Alt aminoacid | Significance | Amino acid Properties |          |
|-----------|---------------------|-----------------------------------------------|--------------|-----------------------|----------|
|           |                     |                                               |              | Serine                | Glycine  |
| rs1422795 | Chr5: T-156936364-C | S-17-G                                        | P = 0.0004   | Polar                 | Nonpolar |
|           |                     |                                               |              | Neutral               | Neutral  |

### Protein domains and functional sites

#### ADAM19 (Wild Type)

#### ADAM19 (Variant induced)

Upper case represents match positions, lower case insert positions, and the '-' symbol represents deletions relative to the matching profile.

Upper case represents match positions, lower case insert positions, and the '-' symbol represents deletions relative to the matching profile.

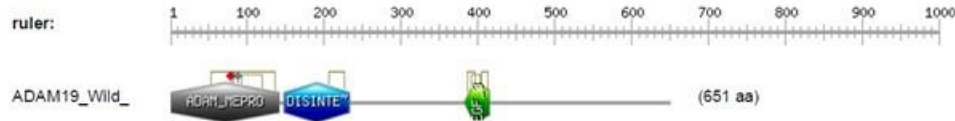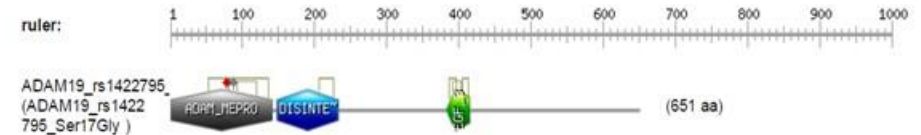

PS50215 ADAM\_MEPRO ADAM type metalloprotease domain profile :

PS50215 ADAM\_MEPRO ADAM type metalloprotease domain profile :

1 - 141: score = 27.751

1 - 141: score = 27.583

```
-----MC
EVSENPYSTLWSFLGWRKLL-AQKYHDNAQLITGMSFHGTTIGLAPLHAMCSVYQSGGV
NMDHSENAIGVAATNAHEHGHNFGNTHDSaDCCSASaAdGGCImAAATGHPPKVFNGCN
RRELDRYLQSGGGMCLSNMP
```

```
-----MC
EVSENPYSTLWSFLGWRKLL-AQKYHDNAQLITGMSFHGTTIGLAPLHAMCSVYQSGGV
NMDHSENAIGVAATNAHEHGHNFGNTHDSaDCCSASaAdGGCImAAATGHPPKVFNGCN
RRELDRYLQSGGGMCLSNMP
```

**Supplementary Figure S2:** Transcript (Gene Paint; mouse embryo) and protein expression (Human Protein atlas; normal lung) domain of holliday junction recognition protein (*HJURP*)

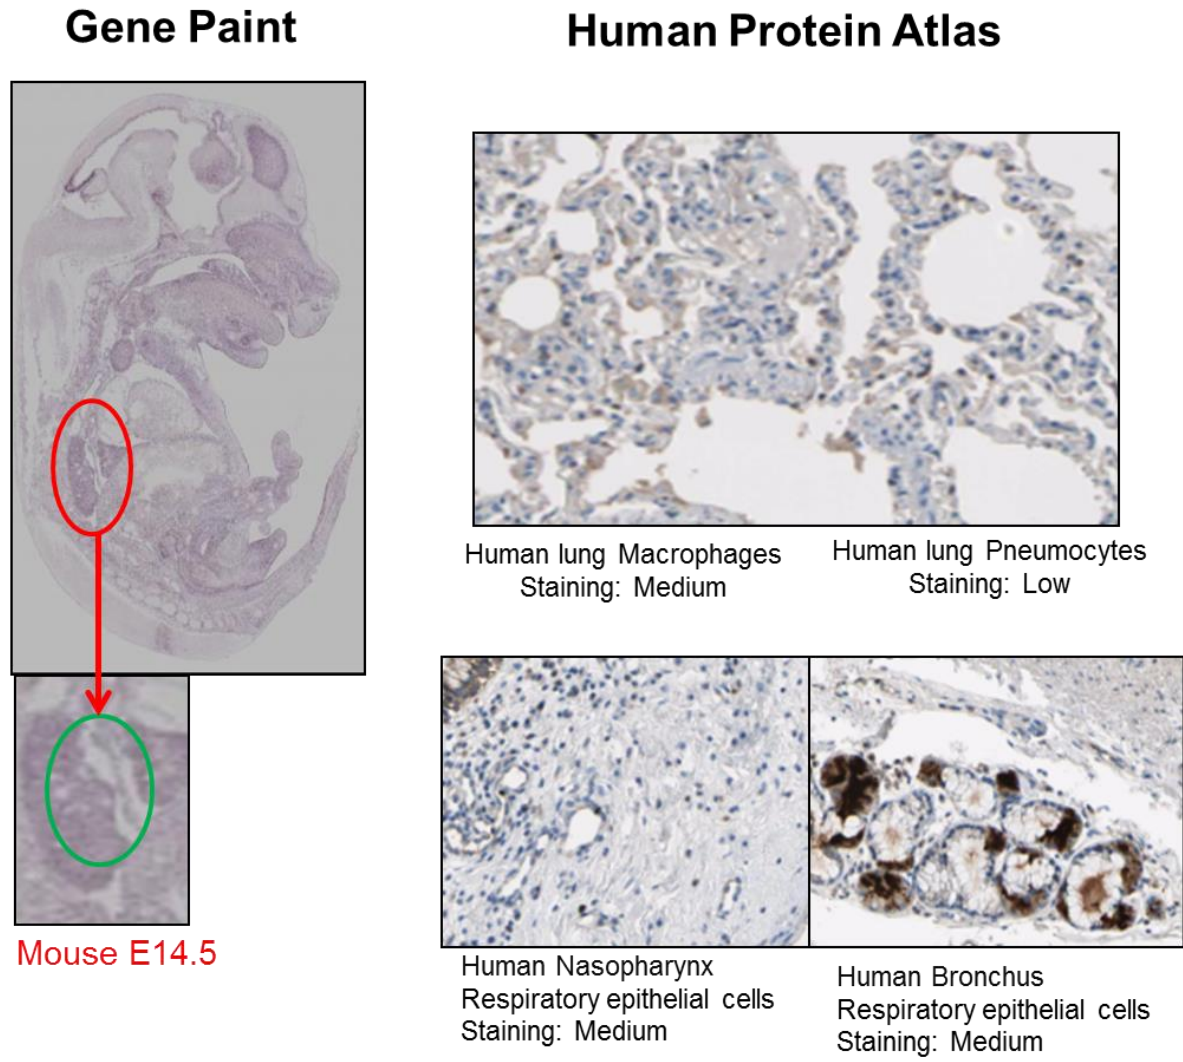



**Supplementary Figure S3:** Transcript (Gene Paint; mouse embryo) and protein expression (Human Protein atlas; normal lung) domain of microspherule protein 1 (MCRS1).

### Gene Paint

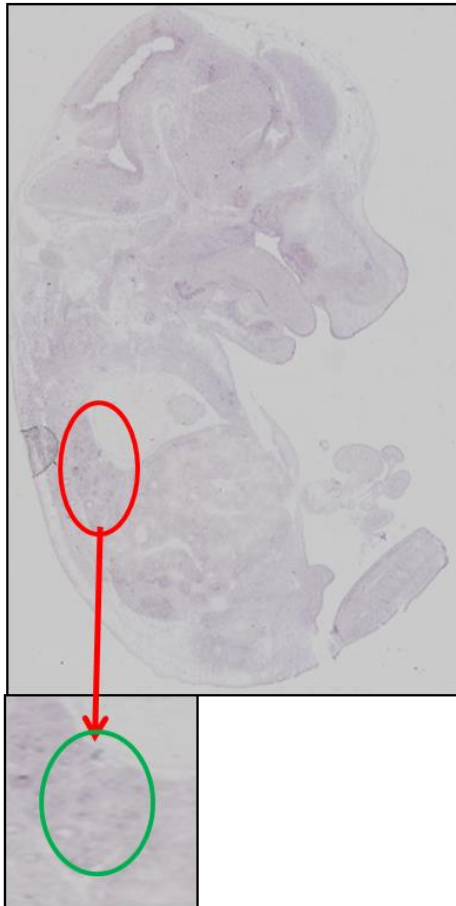

Mouse E14.5

### Human Protein Atlas

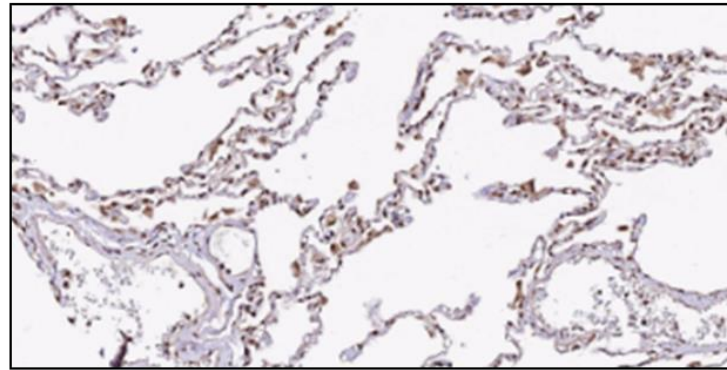

Human lung Macrophages  
Staining: **Medium**

Human lung Pneumocytes  
Staining: **High**

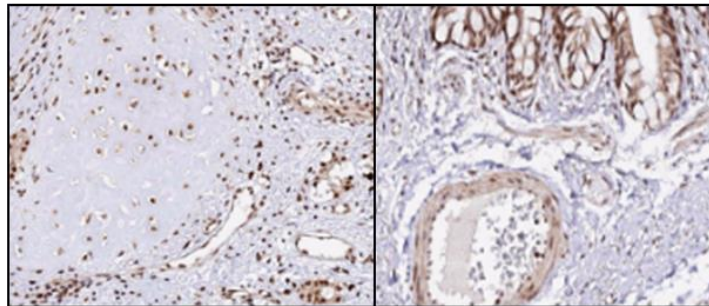

Human Nasopharynx  
Respiratory epithelial cells  
Staining: **High**

Human Bronchus  
Respiratory epithelial cells  
Staining: **Medium**

**Supplementary Figure S4:** Protein expression (Human Protein atlas; normal lung) domain of toll like receptor 8 (TLR8).

## Human Protein Atlas

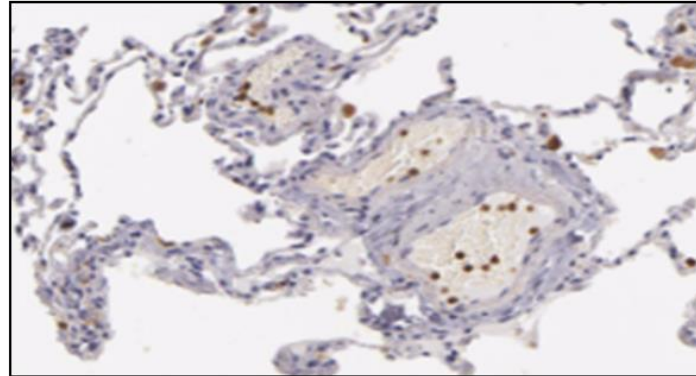

**Human lung Macrophages**  
Staining: **High**

**Human lung Pneumocytes**  
Staining: **Not detected**

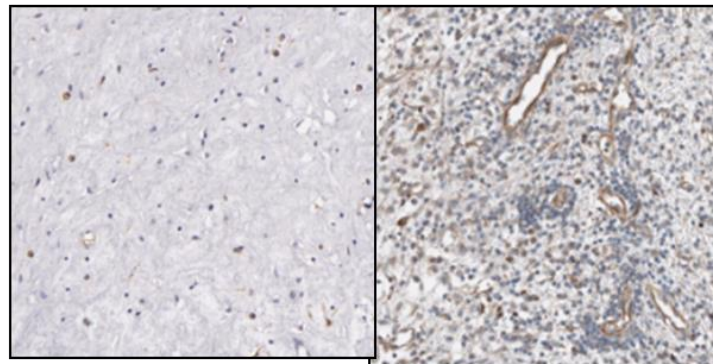

**Human Nasopharynx**  
Respiratory epithelial cells  
Staining: **Low**

**Human Bronchus**  
Respiratory epithelial cells  
Staining: **Low**

**Supplementary Figure S5:** Gene-set enrichment analysis for the associated 20 genes for (A) cellular component enrichment (B) biological process enrichment (C) molecular function enrichment (D) diseases enrichment using Enrichr interactive enrichment analysis tool (Chen et al., 2013.).

**A**

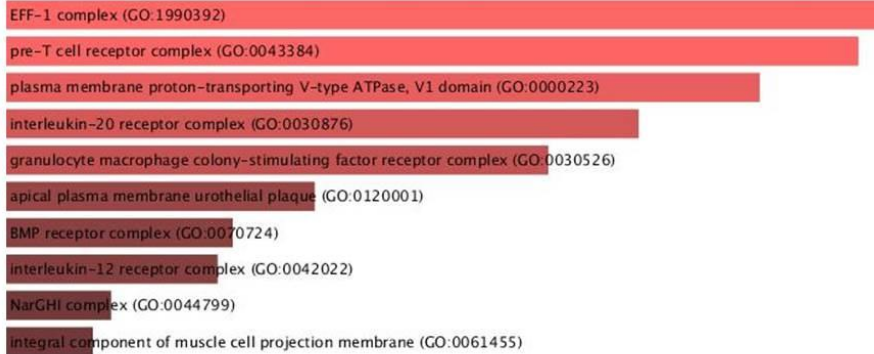

A) Cellular component – Red highlighted p-value < 0.03

**B**

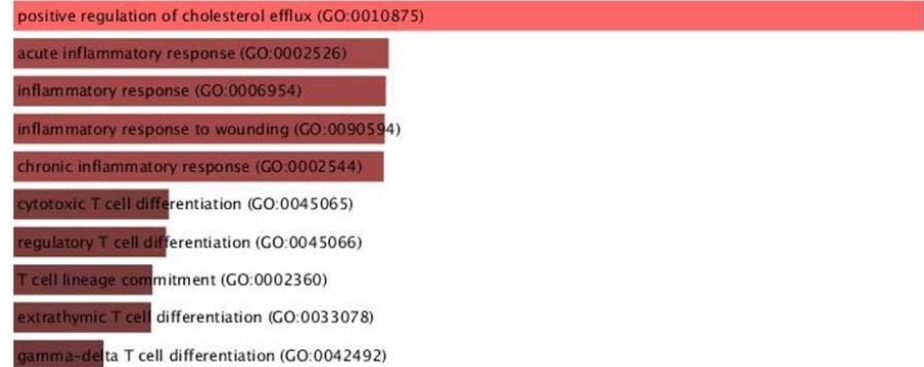

B) Biological process – Red highlighted p-value < 0.001

**C**

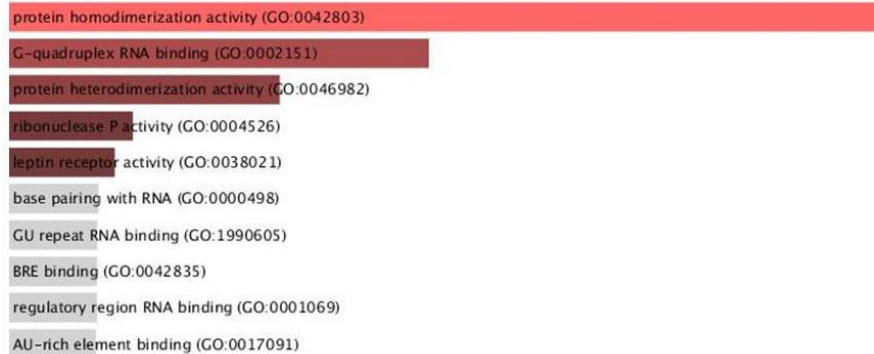

C) Molecular function – Red highlighted p-value < 0.001

**D**

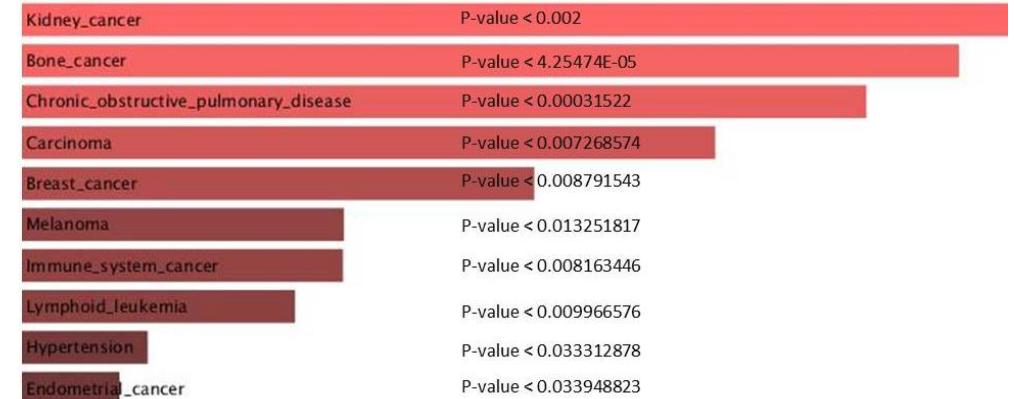

D) Diseases
